# Supplementary material
Source: publisher figshare collection journal article supplement (https://acs.figshare.com/ndownloader/files/34467090)
Supplement: Supplementary file 1 [file 34467090]

## Sheet: jiang
	Dc	Avg.PN	Std.PN	Min.MN	Avg.MN	Std.MN	Max.IR	Min.IR	Avg.IR	Std.IR	Dif.RABC	Std.RABC	Tr	IRM	Max.AV	Min.AV	Avg.AV	Std.AV	Max.CR	Avg.CR	Std.CR	Min.VEC	Avg.VEC	Std.VEC	Min.EN	Avg.EN	Std.EN	Avg.p	Std.p	Max.d	Avg.d	Std.d	Max.f	Avg.f	Std.f	Max.P	Avg.P	Std.P	Max.MT	Avg.MT	Std.MT	Max..FIE	Min.FIE	Avg..FIE	Std..FIE	Min.SIE	Avg.SIE	Std.SIE	Max.TIE
Dc	1	-0.199189	-0.200794	0.269268	0.178756	-0.201587	0.38365	-0.0743919	-0.310259	0.318862	0.0560911	0.166675	-0.277668	0.145294	-0.181238	-0.363827	-0.286058	-0.245371	0.0696741	-0.252443	-0.267481	0.26483	-0.0278345	-0.0780267	-0.0568423	0.111867	-0.192558	0.0650096	-0.110429	-0.178377	-0.108146	-0.111916	-0.0801178	-0.0732824	-0.0748454	0.0643249	-0.179318	-0.228708	-0.125285	-0.108818	-0.126327	0.37446	-0.017553	-0.117319	0.120587	-0.0568423	0.200361	-0.278077	0.0410419
Avg.PN	-0.199189	1	0.998907	0.000737732	-0.0453335	0.0240703	-0.300601	0.606553	0.633237	-0.577234	-0.221537	0.132395	-0.0491111	0.00214938	0.162503	0.265056	0.171403	0.169615	0.175423	0.602871	0.646383	0.0783887	0.147018	0.193535	-0.133749	-0.265671	0.527733	-0.390816	0.556561	0.405645	0.44178	0.431695	0.25864	0.319165	0.316016	0.157698	0.3804	0.366084	0.404135	-0.3121	-0.251566	-0.342976	-0.282621	-0.465602	0.443209	-0.133749	0.18738	-0.102938	-0.344601
Std.PN	-0.200794	0.998907	1	0.00513593	-0.0293776	0.0107264	-0.313884	0.607089	0.631756	-0.579268	-0.2282	0.141142	-0.0547003	0.0128051	0.15993	0.279243	0.163452	0.157535	0.176212	0.588425	0.641285	0.0785818	0.191319	0.22263	-0.134518	-0.232114	0.54133	-0.365736	0.566772	0.406061	0.441676	0.431524	0.263148	0.322653	0.319617	0.158484	0.367104	0.35363	0.405093	-0.32226	-0.259078	-0.358153	-0.284216	-0.466306	0.440545	-0.134518	0.213816	-0.104454	-0.337237
Min.MN	0.269268	0.000737732	0.00513593	1	0.60596	-0.635667	0.139907	0.0746434	-0.533695	0.425198	-0.397785	0.255455	-0.366859	0.247522	-0.736552	-0.33616	-0.762007	-0.772365	-0.106708	-0.425588	-0.416203	0.541426	0.0946411	-0.0233718	0.0854677	-0.0530317	0.135092	0.130478	-0.0855201	-0.477953	-0.193835	-0.230192	0.104982	0.306046	0.283758	-0.0977939	-0.574457	-0.644837	-0.472638	-0.422518	-0.477587	0.211469	0.158955	-0.338064	0.34157	0.0854677	0.552784	-0.630176	0.175687
Avg.MN	0.178756	-0.0453335	-0.0293776	0.60596	1	-0.990982	0.0247485	-0.134434	-0.666805	0.645954	-0.244754	0.519415	-0.372767	0.628311	-0.304053	-0.0466527	-0.714375	-0.765373	0.0960322	-0.74117	-0.687406	0.142747	0.319564	0.143133	-0.130096	0.0994633	0.233704	0.507936	-0.287618	-0.425968	-0.389714	-0.389106	0.511513	0.618943	0.617636	0.112179	-0.835941	-0.845425	-0.267211	-0.351099	-0.407694	-0.0352807	-0.145574	-0.154679	0.137992	-0.130096	0.652036	-0.591043	0.362625
Std.MN	-0.201587	0.0240703	0.0107264	-0.635667	-0.990982	1	-0.0793277	0.0934214	0.685728	-0.657754	0.254259	-0.563071	0.430397	-0.624527	0.33928	0.123647	0.776561	0.795972	-0.096541	0.712347	0.669321	-0.204172	-0.277083	-0.0866456	0.125811	-0.0376857	-0.241663	-0.416414	0.236696	0.389358	0.323772	0.325581	-0.493228	-0.604129	-0.602208	-0.110513	0.825554	0.852306	0.247105	0.374599	0.437397	-0.025542	0.142857	0.24765	-0.236539	0.125811	-0.68528	0.668709	-0.287167
Max.IR	0.38365	-0.300601	-0.313884	0.139907	0.0247485	-0.0793277	1	-0.336651	-0.302806	0.452513	0.325085	0.352453	-0.404917	0.0109088	0.0191864	-0.809244	-0.237373	-0.0754475	0.281303	-0.176057	-0.257767	0.268943	-0.259969	-0.564837	-0.268188	-0.0672377	-0.414367	-0.00115597	-0.341149	-0.231725	-0.114192	-0.114509	-0.252888	-0.238009	-0.237847	0.277291	-0.167025	-0.204947	-0.260542	-0.0688382	-0.143132	0.875367	-0.0746874	-0.18006	0.231756	-0.268188	0.0215935	-0.311735	-0.26087
Min.IR	-0.0743919	0.606553	0.607089	0.0746434	-0.134434	0.0934214	-0.336651	1	0.437108	-0.53894	-0.412086	0.0556642	-0.0694715	-0.0838658	-0.191949	0.173768	-0.0166819	-0.0286376	-0.147326	0.411487	0.444272	0.430052	0.123382	0.121718	0.18717	-0.0504375	0.222885	-0.408398	0.538616	0.370452	0.478712	0.462463	-0.0969892	-0.0728498	-0.0774906	-0.166455	0.219006	0.176888	0.194091	-0.418379	-0.383748	-0.259531	0.121434	-0.378144	0.363691	0.18717	0.230293	-0.184916	-0.421038
Avg.IR	-0.310259	0.633237	0.631756	-0.533695	-0.666805	0.685728	-0.302806	0.437108	1	-0.900398	0.0858197	-0.29702	0.330071	-0.428003	0.473745	0.387755	0.787779	0.763697	0.131086	0.851811	0.885932	-0.25273	0.050996	0.212854	-0.0776664	0.00181096	0.141302	-0.380289	0.494533	0.596997	0.44597	0.458761	-0.227569	-0.299108	-0.295981	0.107716	0.80792	0.839724	0.447393	0.0177677	0.105639	-0.336872	-0.126558	0.0372515	-0.0581877	-0.0776664	-0.376677	0.541395	-0.321171
Std.IR	0.318862	-0.577234	-0.579268	0.425198	0.645954	-0.657754	0.452513	-0.53894	-0.900398	1	0.224368	0.494896	-0.451726	0.455333	-0.129569	-0.369917	-0.625876	-0.551986	0.227834	-0.812859	-0.860614	0.134937	-0.114254	-0.265587	-0.289926	-0.0072485	-0.215386	0.487851	-0.661694	-0.668602	-0.577666	-0.583314	0.220736	0.286057	0.285736	0.257632	-0.70698	-0.730314	-0.49317	-0.0564487	-0.147743	0.325634	-0.151438	-0.0571417	0.0840726	-0.289926	0.321217	-0.520861	0.237854
Dif.RABC	0.0560911	-0.221537	-0.2282	-0.397785	-0.244754	0.254259	0.325085	-0.412086	0.0858197	0.224368	1	0.216584	-0.303747	-0.294369	0.687753	-0.0719709	0.410487	0.588875	0.510609	0.0103961	-0.0265902	-0.266319	-0.172225	-0.119499	-0.513529	-0.0690726	-0.12712	0.243459	-0.395695	-0.0547413	-0.358329	-0.320835	-0.120683	-0.197111	-0.190433	0.515474	0.316971	0.341691	-0.0326724	0.113336	0.0719401	0.0804174	-0.372078	-0.00107834	0.0155387	-0.513529	-0.23503	0.165517	-0.202766
Std.RABC	0.166675	0.132395	0.141142	0.255455	0.519415	-0.563071	0.352453	0.0556642	-0.29702	0.494896	0.216584	1	-0.829881	0.388454	0.202289	-0.186152	-0.49221	-0.345993	0.607463	-0.380624	-0.345932	0.25129	0.271988	-0.0492008	-0.621871	0.141107	0.05056	0.261411	-0.123846	-0.179187	-0.113135	-0.112891	0.13467	0.161099	0.164004	0.61822	-0.355801	-0.421329	-0.169011	-0.608507	-0.635627	0.0779902	-0.465065	-0.594687	0.588555	-0.621871	0.69624	-0.722905	-0.36063
Tr	-0.277668	-0.0491111	-0.0547003	-0.366859	-0.372767	0.430397	-0.404917	-0.0694715	0.330071	-0.451726	-0.303747	-0.829881	1	-0.183029	0.0162039	0.356815	0.512925	0.33155	-0.388869	0.357766	0.339881	-0.482154	-0.19847	0.122272	0.387136	-0.0725281	-0.0315376	-0.214839	0.14337	0.250338	0.14781	0.150347	0.00503679	-0.0375481	-0.0340347	-0.390776	0.292648	0.369718	0.278472	0.643645	0.687018	-0.239734	0.225761	0.680839	-0.68329	0.387136	-0.682051	0.762645	0.448289
IRM	0.145294	0.00214938	0.0128051	0.247522	0.628311	-0.624527	0.0109088	-0.0838658	-0.428003	0.455333	-0.294369	0.388454	-0.183029	1	-0.0712874	0.0164229	-0.461953	-0.497743	0.0793976	-0.39915	-0.358299	0.0532711	0.224257	0.137988	-0.147792	0.0484721	0.205718	0.285836	-0.116363	-0.302732	-0.135496	-0.155209	0.644463	0.555894	0.569621	0.111032	-0.549884	-0.548485	-0.149342	-0.0712035	-0.0934942	-0.0608166	-0.233849	-0.15765	0.141405	-0.147792	0.410001	-0.346914	0.19671
Max.AV	-0.181238	0.162503	0.15993	-0.736552	-0.304053	0.33928	0.0191864	-0.191949	0.473745	-0.129569	0.687753	0.202289	0.0162039	-0.0712874	1	0.337488	0.67008	0.746695	0.622066	0.300226	0.303018	-0.578483	-0.0406447	0.101073	-0.623052	0.0136075	-0.00513088	0.102457	-0.0984055	0.256907	-0.0680579	-0.0318462	0.0539567	-0.0614486	-0.045403	0.626824	0.492125	0.547221	0.296452	0.180196	0.212866	-0.2944	-0.565885	0.107597	-0.116785	-0.623052	-0.321014	0.396219	-0.206112
Min.AV	-0.363827	0.265056	0.279243	-0.33616	-0.0466527	0.123647	-0.809244	0.173768	0.387755	-0.369917	-0.0719709	-0.186152	0.356815	0.0164229	0.337488	1	0.431605	0.272538	0.0497183	0.144536	0.22902	-0.454219	0.269101	0.591647	-0.0685478	0.20023	0.279931	0.182378	0.167169	0.168156	0.0525771	0.0687078	0.220379	0.163982	0.169578	0.0586205	0.211436	0.275012	0.255596	0.0564569	0.142943	-0.912001	-0.174369	0.299177	-0.353979	-0.0685478	-0.0805427	0.39539	0.282261
Avg.AV	-0.286058	0.171403	0.163452	-0.762007	-0.714375	0.776561	-0.237373	-0.0166819	0.787779	-0.625876	0.410487	-0.49221	0.512925	-0.461953	0.67008	0.431605	1	0.945847	0.117532	0.602849	0.588189	-0.539794	-0.180729	0.109703	-0.10074	0.0176742	-0.128655	-0.0912163	0.0212223	0.361876	0.0504611	0.0852805	-0.199874	-0.332288	-0.322352	0.110714	0.744948	0.834925	0.317314	0.360218	0.421132	-0.298143	-0.11636	0.473419	-0.479207	-0.10074	-0.727628	0.822633	-0.0338871
Std.AV	-0.245371	0.169615	0.157535	-0.772365	-0.765373	0.795972	-0.0754475	-0.0286376	0.763697	-0.551986	0.588875	-0.345993	0.33155	-0.497743	0.746695	0.272538	0.945847	1	0.214915	0.66202	0.629272	-0.486796	-0.250475	0.00688692	-0.193726	-0.106531	-0.0937633	-0.209284	0.0681392	0.435636	0.122674	0.159321	-0.237197	-0.370665	-0.361507	0.206773	0.821765	0.879517	0.371792	0.358057	0.395186	-0.179986	-0.192327	0.256027	-0.251509	-0.193726	-0.681263	0.702464	-0.237096
Max.CR	0.0696741	0.175423	0.176212	-0.106708	0.0960322	-0.096541	0.281303	-0.147326	0.131086	0.227834	0.510609	0.607463	-0.388869	0.0793976	0.622066	0.0497183	0.117532	0.214915	1	0.00674503	0.0170193	-0.187036	0.0501628	0.0396668	-0.972313	0.0902131	-0.0429212	0.169956	-0.1335	-0.0446702	-0.124182	-0.113235	0.0145735	0.0167997	0.0212202	0.994344	0.170238	0.161563	-0.00109441	-0.216169	-0.195537	-0.0715953	-0.793022	-0.185077	0.180221	-0.972313	0.135745	-0.129664	-0.187036
Avg.CR	-0.252443	0.602871	0.588425	-0.425588	-0.74117	0.712347	-0.176057	0.411487	0.851811	-0.812859	0.0103961	-0.380624	0.357766	-0.39915	0.300226	0.144536	0.602849	0.66202	0.00674503	1	0.978407	-0.14761	-0.201687	0.00217997	0.0465671	-0.383639	0.26865	-0.736758	0.643237	0.652599	0.64041	0.631967	-0.140009	-0.186388	-0.186829	-0.0174379	0.855716	0.848703	0.518576	0.271539	0.324477	-0.145774	-0.0658769	-0.138793	0.14037	0.0465671	-0.474366	0.473332	-0.386239
Std.CR	-0.267481	0.646383	0.641285	-0.416203	-0.687406	0.669321	-0.257767	0.444272	0.885932	-0.860614	-0.0265902	-0.345932	0.339881	-0.358299	0.303018	0.22902	0.588189	0.629272	0.0170193	0.978407	1	-0.147164	-0.00424591	0.151959	0.0384833	-0.251749	0.359001	-0.652913	0.724242	0.680518	0.666843	0.657572	-0.111244	-0.161011	-0.161054	-0.00808795	0.829196	0.82563	0.547266	0.22094	0.288957	-0.238199	-0.0855286	-0.161868	0.146333	0.0384833	-0.359441	0.47536	-0.373857
Min.VEC	0.26483	0.0783887	0.0785818	0.541426	0.142747	-0.204172	0.268943	0.430052	-0.25273	0.134937	-0.266319	0.25129	-0.482154	0.0532711	-0.578483	-0.454219	-0.539794	-0.486796	-0.187036	-0.14761	-0.147164	1	0.0731683	-0.121018	0.157857	0.0118521	-0.00734502	-0.0601791	0.0674398	-0.304536	0.0757628	0.0349017	-0.168925	-0.0480505	-0.0604403	-0.17507	-0.295488	-0.353521	-0.387515	-0.504188	-0.525281	0.378162	0.274732	-0.51462	0.520766	0.157857	0.497159	-0.600202	-0.442308
Avg.VEC	-0.0278345	0.147018	0.191319	0.0946411	0.319564	-0.277083	-0.259969	0.123382	0.050996	-0.114254	-0.172225	0.271988	-0.19847	0.224257	-0.0406447	0.269101	-0.180729	-0.250475	0.0501628	-0.201687	-0.00424591	0.0731683	1	0.486463	-0.0423369	0.688301	0.305116	0.453918	0.290336	0.0841005	0.104103	0.101286	0.0919213	0.0734342	0.0766119	0.0469535	-0.239286	-0.230851	0.0768637	-0.291288	-0.230715	-0.30427	-0.0707932	-0.140183	0.0687638	-0.0423369	0.610473	-0.0989544	0.0177768
Std.VEC	-0.0780267	0.193535	0.22263	-0.0233718	0.143133	-0.0866456	-0.564837	0.121718	0.212854	-0.265587	-0.119499	-0.0492008	0.122272	0.137988	0.101073	0.591647	0.109703	0.00688692	0.0396668	0.00217997	0.151959	-0.121018	0.486463	1	-0.0396952	0.31287	0.533461	0.252058	0.359662	0.0721789	0.013507	0.0102908	0.22933	0.231465	0.230542	0.0399545	0.0385232	0.0684793	0.128047	-0.101802	-0.0413142	-0.63203	-0.115698	-0.00604434	-0.0771984	-0.0396952	0.292075	0.166124	0.160463
Min.EN	-0.0568423	-0.133749	-0.134518	0.0854677	-0.130096	0.125811	-0.268188	0.18717	-0.0776664	-0.289926	-0.513529	-0.621871	0.387136	-0.147792	-0.623052	-0.0685478	-0.10074	-0.193726	-0.972313	0.0465671	0.0384833	0.157857	-0.0423369	-0.0396952	1	-0.0828349	0.0411859	-0.225245	0.195566	0.108687	0.187704	0.178555	-0.057122	-0.055553	-0.0606486	-0.991632	-0.118507	-0.114414	0.0586451	0.198766	0.183134	0.0984027	0.769815	0.160852	-0.156147	1	-0.136087	0.134026	0.157857
Avg.EN	0.111867	-0.265671	-0.232114	-0.0530317	0.0994633	-0.0376857	-0.0672377	-0.0504375	0.00181096	-0.0072485	-0.0690726	0.141107	-0.0725281	0.0484721	0.0136075	0.20023	0.0176742	-0.106531	0.0902131	-0.383639	-0.251749	0.0118521	0.688301	0.31287	-0.0828349	1	-0.41307	0.597395	-0.102623	-0.142715	-0.154964	-0.142495	-0.381733	-0.440725	-0.435622	0.0874848	-0.256755	-0.228737	-0.160805	-0.309887	-0.235787	-0.123918	0.0224138	0.269528	-0.317216	-0.0828349	0.341804	0.0225945	0.110839
Std.EN	-0.192558	0.527733	0.54133	0.135092	0.233704	-0.241663	-0.414367	0.222885	0.141302	-0.215386	-0.12712	0.05056	-0.0315376	0.205718	-0.00513088	0.279931	-0.128655	-0.0937633	-0.0429212	0.26865	0.359001	-0.00734502	0.305116	0.533461	0.0411859	-0.41307	1	-0.177474	0.542481	0.273257	0.277057	0.258535	0.633932	0.687646	0.68402	-0.0424298	0.105537	0.094458	0.314529	0.0578481	0.0531282	-0.41844	-0.142201	-0.438421	0.392369	0.0411859	0.27559	-0.0352972	-0.0352745
Avg.p	0.0650096	-0.390816	-0.365736	0.130478	0.507936	-0.416414	-0.00115597	-0.408398	-0.380289	0.487851	0.243459	0.261411	-0.214839	0.285836	0.102457	0.182378	-0.0912163	-0.209284	0.169956	-0.736758	-0.652913	-0.0601791	0.453918	0.252058	-0.225245	0.597395	-0.177474	1	-0.681631	-0.656181	-0.757048	-0.743773	0.113615	0.121941	0.12653	0.196261	-0.580373	-0.499804	-0.527237	-0.248426	-0.268057	-0.126429	-0.0655867	0.325316	-0.357632	-0.225245	0.287451	-0.047919	0.379611
Std.p	-0.110429	0.556561	0.566772	-0.0855201	-0.287618	0.236696	-0.341149	0.538616	0.494533	-0.661694	-0.395695	-0.123846	0.14337	-0.116363	-0.0984055	0.167169	0.0212223	0.0681392	-0.1335	0.643237	0.724242	0.0674398	0.290336	0.359662	0.195566	-0.102623	0.542481	-0.681631	1	0.754922	0.852581	0.836042	0.0121757	-0.00680488	-0.0099757	-0.162633	0.470227	0.401507	0.635039	0.0490427	0.125651	-0.259722	-0.0120584	-0.423937	0.387269	0.195566	0.165421	0.0442043	-0.330399
Max.d	-0.178377	0.405645	0.406061	-0.477953	-0.425968	0.389358	-0.231725	0.370452	0.596997	-0.668602	-0.0547413	-0.179187	0.250338	-0.302732	0.256907	0.168156	0.361876	0.435636	-0.0446702	0.652599	0.680518	-0.304536	0.0841005	0.0721789	0.108687	-0.142715	0.273257	-0.656181	0.754922	1	0.74455	0.777687	-0.0555215	-0.182586	-0.174268	-0.0740743	0.627559	0.589972	0.848083	0.239507	0.294258	-0.189838	-0.104038	-0.135179	0.124854	0.108687	-0.185873	0.288129	-0.304536
Avg.d	-0.108146	0.44178	0.441676	-0.193835	-0.389714	0.323772	-0.114192	0.478712	0.44597	-0.577666	-0.358329	-0.113135	0.14781	-0.135496	-0.0680579	0.0525771	0.0504611	0.122674	-0.124182	0.64041	0.666843	0.0757628	0.104103	0.013507	0.187704	-0.154964	0.277057	-0.757048	0.852581	0.74455	1	0.99554	-0.0974528	-0.165229	-0.163829	-0.153912	0.451532	0.380099	0.668286	0.123619	0.191403	-0.0189998	-0.00817182	-0.353583	0.3465	0.187704	0.041092	0.00608486	-0.40411
Std.d	-0.111916	0.431695	0.431524	-0.230192	-0.389106	0.325581	-0.114509	0.462463	0.458761	-0.583314	-0.320835	-0.112891	0.150347	-0.155209	-0.0318462	0.0687078	0.0852805	0.159321	-0.113235	0.631967	0.657572	0.0349017	0.101286	0.0102908	0.178555	-0.142495	0.258535	-0.743773	0.836042	0.777687	0.99554	1	-0.102071	-0.182711	-0.180121	-0.143707	0.461203	0.393411	0.705638	0.131904	0.197669	-0.024426	-0.0247364	-0.328055	0.321128	0.178555	0.0249839	0.023374	-0.399667
Max.f	-0.0801178	0.25864	0.263148	0.104982	0.511513	-0.493228	-0.252888	-0.0969892	-0.227569	0.220736	-0.120683	0.13467	0.00503679	0.644463	0.0539567	0.220379	-0.199874	-0.237197	0.0145735	-0.140009	-0.111244	-0.168925	0.0919213	0.22933	-0.057122	-0.381733	0.633932	0.113615	0.0121757	-0.0555215	-0.0974528	-0.102071	1	0.897122	0.911431	0.0340122	-0.225499	-0.192828	0.177601	0.187438	0.164715	-0.283884	-0.301675	-0.144521	0.127334	-0.057122	0.162956	-0.0899865	0.296097
Avg.f	-0.0732824	0.319165	0.322653	0.306046	0.618943	-0.604129	-0.238009	-0.0728498	-0.299108	0.286057	-0.197111	0.161099	-0.0375481	0.555894	-0.0614486	0.163982	-0.332288	-0.370665	0.0167997	-0.186388	-0.161011	-0.0480505	0.0734342	0.231465	-0.055553	-0.440725	0.687646	0.121941	-0.00680488	-0.182586	-0.165229	-0.182711	0.897122	1	0.999116	0.0345289	-0.312751	-0.289967	0.0313854	0.0807052	0.0498315	-0.268476	-0.225056	-0.245242	0.229947	-0.055553	0.259757	-0.216666	0.266785
Std.f	-0.0748454	0.316016	0.319617	0.283758	0.617636	-0.602208	-0.237847	-0.0774906	-0.295981	0.285736	-0.190433	0.164004	-0.0340347	0.569621	-0.045403	0.169578	-0.322352	-0.361507	0.0212202	-0.186829	-0.161054	-0.0604403	0.0766119	0.230542	-0.0606486	-0.435622	0.68402	0.12653	-0.0099757	-0.174268	-0.163829	-0.180121	0.911431	0.999116	1	0.0392869	-0.311563	-0.286729	0.0428238	0.0894857	0.0592127	-0.270496	-0.235151	-0.235611	0.220067	-0.0606486	0.253317	-0.207477	0.268371
Max.P	0.0643249	0.157698	0.158484	-0.0977939	0.112179	-0.110513	0.277291	-0.166455	0.107716	0.257632	0.515474	0.61822	-0.390776	0.111032	0.626824	0.0586205	0.110714	0.206773	0.994344	-0.0174379	-0.00808795	-0.17507	0.0469535	0.0399545	-0.991632	0.0874848	-0.0424298	0.196261	-0.162633	-0.0740743	-0.153912	-0.143707	0.0340122	0.0345289	0.0392869	1	0.147906	0.141254	-0.027258	-0.209757	-0.191254	-0.0842749	-0.787969	-0.175349	0.170528	-0.991632	0.136841	-0.132545	-0.17507
Avg.P	-0.179318	0.3804	0.367104	-0.574457	-0.835941	0.825554	-0.167025	0.219006	0.80792	-0.70698	0.316971	-0.355801	0.292648	-0.549884	0.492125	0.211436	0.744948	0.821765	0.170238	0.855716	0.829196	-0.295488	-0.239286	0.0385232	-0.118507	-0.256755	0.105537	-0.580373	0.470227	0.627559	0.451532	0.461203	-0.225499	-0.312751	-0.311563	0.147906	1	0.982697	0.477273	0.27602	0.347899	-0.20268	-0.164488	-0.0393702	0.0416932	-0.118507	-0.530461	0.532549	-0.381347
Std.P	-0.228708	0.366084	0.35363	-0.644837	-0.845425	0.852306	-0.204947	0.176888	0.839724	-0.730314	0.341691	-0.421329	0.369718	-0.548485	0.547221	0.275012	0.834925	0.879517	0.161563	0.848703	0.82563	-0.353521	-0.230851	0.0684793	-0.114414	-0.228737	0.094458	-0.499804	0.401507	0.589972	0.380099	0.393411	-0.192828	-0.289967	-0.286729	0.141254	0.982697	1	0.463843	0.327744	0.401312	-0.239805	-0.167563	0.0719379	-0.0724252	-0.114414	-0.605588	0.636589	-0.303952
Max.MT	-0.125285	0.404135	0.405093	-0.472638	-0.267211	0.247105	-0.260542	0.194091	0.447393	-0.49317	-0.0326724	-0.169011	0.278472	-0.149342	0.296452	0.255596	0.317314	0.371792	-0.00109441	0.518576	0.547266	-0.387515	0.0768637	0.128047	0.0586451	-0.160805	0.314529	-0.527237	0.635039	0.848083	0.668286	0.705638	0.177601	0.0313854	0.0428238	-0.027258	0.477273	0.463843	1	0.412131	0.461495	-0.242269	-0.292921	-0.0773495	0.0640533	0.0586451	-0.148622	0.254254	-0.144153
Avg.MT	-0.108818	-0.3121	-0.32226	-0.422518	-0.351099	0.374599	-0.0688382	-0.418379	0.0177677	-0.0564487	0.113336	-0.608507	0.643645	-0.0712035	0.180196	0.0564569	0.360218	0.358057	-0.216169	0.271539	0.22094	-0.504188	-0.291288	-0.101802	0.198766	-0.309887	0.0578481	-0.248426	0.0490427	0.239507	0.123619	0.131904	0.187438	0.0807052	0.0894857	-0.209757	0.27602	0.327744	0.412131	1	0.980403	0.00516795	-0.00982835	0.476432	-0.460142	0.198766	-0.697363	0.673002	0.327492
Std.MT	-0.126327	-0.251566	-0.259078	-0.477587	-0.407694	0.437397	-0.143132	-0.383748	0.105639	-0.147743	0.0719401	-0.635627	0.687018	-0.0934942	0.212866	0.142943	0.421132	0.395186	-0.195537	0.324477	0.288957	-0.525281	-0.230715	-0.0413142	0.183134	-0.235787	0.0531282	-0.268057	0.125651	0.294258	0.191403	0.197669	0.164715	0.0498315	0.0592127	-0.191254	0.347899	0.401312	0.461495	0.980403	1	-0.0720603	-0.0320843	0.493748	-0.484029	0.183134	-0.687712	0.708578	0.321107
Max..FIE	0.37446	-0.342976	-0.358153	0.211469	-0.0352807	-0.025542	0.875367	-0.259531	-0.336872	0.325634	0.0804174	0.0779902	-0.239734	-0.0608166	-0.2944	-0.912001	-0.298143	-0.179986	-0.0715953	-0.145774	-0.238199	0.378162	-0.30427	-0.63203	0.0984027	-0.123918	-0.41844	-0.126429	-0.259722	-0.189838	-0.0189998	-0.024426	-0.283884	-0.268476	-0.270496	-0.0842749	-0.20268	-0.239805	-0.242269	0.00516795	-0.0720603	1	0.20619	-0.115849	0.174368	0.0984027	-0.0427563	-0.273809	-0.193985
Min.FIE	-0.017553	-0.282621	-0.284216	0.158955	-0.145574	0.142857	-0.0746874	0.121434	-0.126558	-0.151438	-0.372078	-0.465065	0.225761	-0.233849	-0.565885	-0.174369	-0.11636	-0.192327	-0.793022	-0.0658769	-0.0855286	0.274732	-0.0707932	-0.115698	0.769815	0.0224138	-0.142201	-0.0655867	-0.0120584	-0.104038	-0.00817182	-0.0247364	-0.301675	-0.225056	-0.235151	-0.787969	-0.164488	-0.167563	-0.292921	-0.00982835	-0.0320843	0.20619	1	0.167766	-0.156702	0.769815	-0.110774	0.068235	0.0692651
Avg..FIE	-0.117319	-0.465602	-0.466306	-0.338064	-0.154679	0.24765	-0.18006	-0.378144	0.0372515	-0.0571417	-0.00107834	-0.594687	0.680839	-0.15765	0.107597	0.299177	0.473419	0.256027	-0.185077	-0.138793	-0.161868	-0.51462	-0.140183	-0.00604434	0.160852	0.269528	-0.438421	0.325316	-0.423937	-0.135179	-0.353583	-0.328055	-0.144521	-0.245242	-0.235611	-0.175349	-0.0393702	0.0719379	-0.0773495	0.476432	0.493748	-0.115849	0.167766	1	-0.995444	0.160852	-0.64692	0.715582	0.668781
Std..FIE	0.120587	0.443209	0.440545	0.34157	0.137992	-0.236539	0.231756	0.363691	-0.0581877	0.0840726	0.0155387	0.588555	-0.68329	0.141405	-0.116785	-0.353979	-0.479207	-0.251509	0.180221	0.14037	0.146333	0.520766	0.0687638	-0.0771984	-0.156147	-0.317216	0.392369	-0.357632	0.387269	0.124854	0.3465	0.321128	0.127334	0.229947	0.220067	0.170528	0.0416932	-0.0724252	0.0640533	-0.460142	-0.484029	0.174368	-0.156702	-0.995444	1	-0.156147	0.60861	-0.727997	-0.67615
Min.SIE	-0.0568423	-0.133749	-0.134518	0.0854677	-0.130096	0.125811	-0.268188	0.18717	-0.0776664	-0.289926	-0.513529	-0.621871	0.387136	-0.147792	-0.623052	-0.0685478	-0.10074	-0.193726	-0.972313	0.0465671	0.0384833	0.157857	-0.0423369	-0.0396952	1	-0.0828349	0.0411859	-0.225245	0.195566	0.108687	0.187704	0.178555	-0.057122	-0.055553	-0.0606486	-0.991632	-0.118507	-0.114414	0.0586451	0.198766	0.183134	0.0984027	0.769815	0.160852	-0.156147	1	-0.136087	0.134026	0.157857
Avg.SIE	0.200361	0.18738	0.213816	0.552784	0.652036	-0.68528	0.0215935	0.230293	-0.376677	0.321217	-0.23503	0.69624	-0.682051	0.410001	-0.321014	-0.0805427	-0.727628	-0.681263	0.135745	-0.474366	-0.359441	0.497159	0.610473	0.292075	-0.136087	0.341804	0.27559	0.287451	0.165421	-0.185873	0.041092	0.0249839	0.162956	0.259757	0.253317	0.136841	-0.530461	-0.605588	-0.148622	-0.697363	-0.687712	-0.0427563	-0.110774	-0.64692	0.60861	-0.136087	1	-0.825576	-0.209214
Std.SIE	-0.278077	-0.102938	-0.104454	-0.630176	-0.591043	0.668709	-0.311735	-0.184916	0.541395	-0.520861	0.165517	-0.722905	0.762645	-0.346914	0.396219	0.39539	0.822633	0.702464	-0.129664	0.473332	0.47536	-0.600202	-0.0989544	0.166124	0.134026	0.0225945	-0.0352972	-0.047919	0.0442043	0.288129	0.00608486	0.023374	-0.0899865	-0.216666	-0.207477	-0.132545	0.532549	0.636589	0.254254	0.673002	0.708578	-0.273809	0.068235	0.715582	-0.727997	0.134026	-0.825576	1	0.308994
Max.TIE	0.0410419	-0.344601	-0.337237	0.175687	0.362625	-0.287167	-0.26087	-0.421038	-0.321171	0.237854	-0.202766	-0.36063	0.448289	0.19671	-0.206112	0.282261	-0.0338871	-0.237096	-0.187036	-0.386239	-0.373857	-0.442308	0.0177768	0.160463	0.157857	0.110839	-0.0352745	0.379611	-0.330399	-0.304536	-0.40411	-0.399667	0.296097	0.266785	0.268371	-0.17507	-0.381347	-0.303952	-0.144153	0.327492	0.321107	-0.193985	0.0692651	0.668781	-0.67615	0.157857	-0.209214	0.308994	1
Min.TIE	-0.0587937	-0.187178	-0.187318	0.0966102	0.136415	-0.116212	-0.0750329	-0.156868	-0.2334	0.244775	-0.0235253	0.0181006	0.0345336	0.281808	-0.0392367	0.0760014	-0.0785892	-0.103965	-0.186299	-0.2244	-0.234322	0.135755	-0.0364092	-0.00261193	-0.0484501	-0.0373459	0.0103373	0.220426	-0.251448	-0.265795	-0.258234	-0.266552	0.177872	0.16176	0.164289	-0.0808992	-0.229094	-0.20925	-0.241908	0.0879581	0.0655877	-0.107955	0.153327	0.114784	-0.113818	-0.0484501	-0.00810371	-0.0091973	0.135755
Avg.TIE	-0.149358	-0.275069	-0.272205	-0.349301	0.00450457	0.0971099	-0.354437	-0.323529	0.0876678	-0.109826	-0.0544012	-0.544652	0.70133	-0.0475925	0.188146	0.471766	0.479398	0.244202	-0.132069	-0.124001	-0.120974	-0.622491	-0.0725857	0.214188	0.117237	0.196243	-0.190138	0.317429	-0.303004	-0.0179008	-0.326444	-0.290904	0.107855	0.0201589	0.0310174	-0.126243	-0.0307863	0.0872448	0.0934815	0.465071	0.491828	-0.319843	0.0344749	0.924132	-0.936624	0.117237	-0.556809	0.699933	0.713816
Std.TIE	0.209103	0.173164	0.183085	0.678231	0.474747	-0.556593	0.183881	0.264748	-0.390515	0.291488	-0.418803	0.512802	-0.510569	0.410825	-0.528906	-0.366598	-0.837529	-0.732257	0.00917431	-0.17681	-0.132249	0.537096	0.300223	-0.0311407	-0.00165259	-0.0287113	0.282083	-0.16263	0.339622	-0.100198	0.285919	0.240013	0.0845544	0.205799	0.195226	0.00581934	-0.426455	-0.541951	-0.150415	-0.422947	-0.454333	0.201954	0.00487	-0.692777	0.685862	-0.00165259	0.74055	-0.756704	-0.218228
Max.CEB	-0.0872074	0.290447	0.288215	-0.465449	-0.411155	0.365841	-0.0439379	0.21244	0.487887	-0.549407	0.0219717	-0.168253	0.224293	-0.305231	0.247626	-0.0183267	0.309674	0.414755	-0.0283803	0.59253	0.601703	-0.319024	0.018217	-0.0417653	0.0985986	-0.174961	0.199854	-0.659554	0.681118	0.96768	0.706701	0.742455	-0.0720808	-0.20743	-0.198546	-0.0604902	0.583038	0.540794	0.845724	0.319367	0.356456	0.00734759	-0.117855	-0.122707	0.123506	0.0985986	-0.216398	0.260899	-0.283611
Min.CEB	0.1971	0.106601	0.10532	0.377166	0.0158377	-0.092175	0.319078	0.449472	-0.133481	0.0580225	-0.168744	0.337275	-0.513509	0.0084451	-0.405839	-0.481928	-0.448866	-0.339855	-0.0447923	-0.0269347	-0.0291828	0.872396	0.0635746	-0.145344	0.0549856	0.0108514	-0.0268218	-0.182132	0.179979	-0.107631	0.214976	0.184123	-0.243963	-0.16155	-0.170496	-0.0497353	-0.130972	-0.207823	-0.256273	-0.489822	-0.507013	0.39009	0.186902	-0.604334	0.61069	0.0549856	0.469133	-0.578375	-0.656461
Avg.CEB	0.174483	0.00592598	-0.0160781	0.123874	-0.170159	0.0525461	0.446685	0.0673424	-0.192884	0.146453	0.016694	0.12365	-0.238459	-0.0607318	-0.208729	-0.607777	-0.357206	-0.117164	-0.0603268	0.253371	0.15394	0.262901	-0.369644	-0.59704	0.0922101	-0.531049	0.0126611	-0.699092	0.307299	0.300753	0.50006	0.486209	-0.0748327	-0.0613653	-0.0657701	-0.0752353	0.150163	0.0387313	0.265926	0.197992	0.148792	0.52038	0.00735135	-0.53187	0.586946	0.0922101	0.0163247	-0.371846	-0.417591
Std.CEB	-0.0957624	-0.066075	-0.0832586	-0.550316	-0.436491	0.432013	-0.09211	-0.144355	0.28405	-0.308824	0.0781581	-0.54314	0.618997	-0.26824	0.270175	0.102393	0.484489	0.493333	-0.124975	0.447996	0.375355	-0.58548	-0.384625	-0.234365	0.162794	-0.307363	-0.0896137	-0.527706	0.238934	0.625746	0.381572	0.42061	-0.00656238	-0.147486	-0.136075	-0.143029	0.487933	0.506597	0.666253	0.759228	0.78304	-0.0212768	-0.0687723	0.430524	-0.402106	0.162794	-0.694748	0.585179	0.188737
Min.AE	0.0632866	0.253283	0.254385	0.471334	0.205833	-0.246206	-0.0467138	0.558269	-0.123245	0.120321	-0.102845	0.405814	-0.53676	0.0794978	-0.282968	-0.0945587	-0.396436	-0.344131	0.0881124	-0.118085	-0.104813	0.771543	0.0905248	0.0354305	-0.110853	-0.0295894	0.12942	0.0281995	0.0379779	-0.264353	-0.0489841	-0.0791707	-0.0276238	0.111376	0.0979203	0.0990579	-0.177068	-0.225046	-0.342388	-0.592162	-0.600797	-0.0839436	0.0287263	-0.550819	0.545919	-0.110853	0.51506	-0.571644	-0.465123
Avg.AE	-0.0488862	-0.286436	-0.259097	0.0608517	0.47825	-0.370384	-0.244835	-0.417529	-0.268832	0.316979	0.0972227	0.00265341	0.0991554	0.364813	0.112838	0.376502	0.0116671	-0.156545	0.0634285	-0.527001	-0.422444	-0.253627	0.48315	0.443201	-0.117659	0.40115	0.166663	0.854392	-0.450559	-0.491953	-0.616847	-0.614094	0.390053	0.39039	0.39643	0.088515	-0.445963	-0.343206	-0.373794	0.0546131	0.0488577	-0.330453	-0.053732	0.429257	-0.476871	-0.117659	0.108247	0.23688	0.581889
Std.AE	0.00363707	0.147457	0.123989	-0.317005	-0.663921	0.592384	0.102811	0.271304	0.39353	-0.433526	-0.000476445	-0.237287	0.157615	-0.517429	0.0502564	-0.163808	0.274444	0.38153	-0.0660963	0.550427	0.459261	-0.0124067	-0.459468	-0.329124	0.120782	-0.208787	-0.315679	-0.773819	0.418619	0.579603	0.585786	0.59898	-0.501779	-0.565352	-0.567076	-0.0914082	0.601399	0.52947	0.498902	0.146027	0.195395	0.17925	0.0310993	-0.0968796	0.13613	0.120782	-0.321766	0.0667168	-0.412718
Max.RM	0.0200327	-0.0814376	-0.0826337	-0.386697	-0.152042	0.152678	0.119466	-0.49973	0.062587	-0.0158525	0.299391	-0.152501	0.224761	-0.171094	0.339589	-0.0266093	0.242341	0.309033	0.126797	0.131013	0.123223	-0.576439	-0.0468922	-0.0502409	-0.085931	-0.042854	-0.0141463	-0.163182	0.123695	0.397373	0.174873	0.212423	0.0392654	-0.0766611	-0.0668555	0.109103	0.234683	0.237441	0.633208	0.547495	0.56073	0.0812561	-0.335823	0.208701	-0.203604	-0.085931	-0.253197	0.270359	0.161753
Avg.RM	0.106337	-0.449065	-0.451669	0.025375	0.131377	-0.145223	0.191987	-0.480537	-0.473338	0.412272	0.0959407	-0.167823	0.173923	0.150224	-0.107587	-0.272551	-0.226786	-0.14013	-0.163681	-0.159707	-0.192377	-0.194864	-0.116069	-0.183287	0.139662	-0.245196	0.0986165	-0.0576074	-0.0697606	-0.00420839	-0.012613	-0.0102473	0.236292	0.198189	0.202008	-0.153899	-0.221158	-0.223456	0.2587	0.750633	0.662229	0.240377	-0.0594886	0.157243	-0.138755	0.139662	-0.199036	0.134408	0.276663
Std.RM	0.0709643	-0.408807	-0.411225	-0.0887116	0.0491814	-0.0577262	0.156451	-0.476113	-0.376633	0.349003	0.178682	-0.17756	0.197268	0.103821	0.0158775	-0.2029	-0.109939	-0.0167563	-0.106228	-0.0909885	-0.119665	-0.263156	-0.110952	-0.149785	0.0817683	-0.225708	0.096029	-0.0668269	-0.0462066	0.0622666	0.00933395	0.0170404	0.222116	0.160333	0.166186	-0.0958473	-0.119905	-0.114921	0.34321	0.788715	0.714378	0.175496	-0.126863	0.179786	-0.164219	0.0817683	-0.247778	0.205298	0.240295
Max.TC	0.0931408	-0.176951	-0.173028	0.155068	0.188424	-0.247122	0.165871	-0.156304	-0.404953	0.336525	0.0447298	0.338082	-0.336556	0.145679	-0.109271	-0.277222	-0.474399	-0.325822	0.0957412	-0.157039	-0.149773	0.0906409	0.0685493	-0.0352896	-0.0945668	-0.17967	0.253476	-0.180587	0.217435	0.110276	0.195384	0.182493	0.16492	0.18232	0.181592	0.0958707	-0.147173	-0.213794	0.125912	0.122494	0.117953	0.126569	-0.136395	-0.387872	0.391283	-0.0945668	0.293977	-0.33213	-0.128542
Min.TC	-0.37446	0.342976	0.358153	-0.159933	0.0346625	0.0221349	-0.875367	0.259531	0.321934	-0.343196	-0.149405	-0.120753	0.254508	0.0608166	0.193828	0.818207	0.256873	0.129833	0.0715953	0.149945	0.241654	-0.296426	0.30427	0.614591	-0.0984027	0.117537	0.417896	0.093646	0.28808	0.189838	0.0522198	0.0553278	0.283884	0.268476	0.270496	0.0842749	0.198024	0.234564	0.242269	-0.00251507	0.0751081	-0.893466	-0.20619	0.102158	-0.158783	-0.0984027	0.0547068	0.254622	0.193985
Avg.TC	0.137591	-0.51127	-0.512148	0.0125144	0.156955	-0.197457	0.278123	-0.417579	-0.526073	0.466582	0.354383	0.0951928	-0.197865	0.0316504	-0.0481568	-0.371091	-0.31205	-0.119438	-0.0961151	-0.267946	-0.295993	-0.0739298	-0.0975073	-0.137382	0.087703	-0.277603	0.174385	-0.0355852	-0.0660815	0.0846667	-0.0564276	-0.0351141	0.181022	0.137616	0.140126	-0.0929578	-0.177126	-0.212641	0.177955	0.443484	0.331979	0.290565	-0.0148424	-0.153881	0.171257	0.087703	0.0136374	-0.102341	-0.00120429
Std.TC	0.143155	-0.456394	-0.455955	0.0730273	0.184608	-0.232608	0.287076	-0.376437	-0.527181	0.465443	0.32453	0.147475	-0.251806	0.0594151	-0.0790133	-0.391472	-0.372871	-0.167988	-0.0784289	-0.248656	-0.268437	-0.0162227	-0.0528563	-0.124159	0.0701874	-0.289138	0.233036	-0.0587221	-0.0108809	0.084911	-0.0181335	-0.00251658	0.194859	0.16779	0.168654	-0.0752266	-0.18837	-0.233533	0.164964	0.394625	0.282064	0.291043	-0.0274003	-0.241328	0.255874	0.0701874	0.0844303	-0.162246	-0.044172
T60	0.308747	-0.341921	-0.345712	0.0155328	0.0677494	-0.074125	0.351364	-0.288743	-0.355609	0.514435	0.462311	0.337121	-0.379471	0.0665049	0.238197	-0.189843	-0.103924	0.0230205	0.304595	-0.332588	-0.366702	0.091259	-0.119954	-0.125222	-0.334445	0.0666575	-0.242109	0.233109	-0.354083	-0.261133	-0.291662	-0.276938	-0.0206421	0.0266337	0.024261	0.320272	-0.0849081	-0.105745	-0.125433	0.0660474	0.0358032	0.164117	-0.231467	-0.177358	0.192225	-0.334445	0.114949	-0.23438	-0.221341
Wavelength	0.209048	-0.45582	-0.447434	0.450749	0.543709	-0.524075	0.147947	-0.438204	-0.622162	0.529184	-0.133281	-0.0651656	0.00130505	0.294047	-0.440106	-0.207133	-0.468357	-0.550952	-0.160082	-0.553893	-0.545413	0.0125303	0.0736592	0.014007	0.164906	0.0530172	0.0118886	0.414208	-0.380592	-0.543133	-0.420297	-0.437912	0.174487	0.218073	0.217017	-0.163383	-0.655885	-0.633561	-0.440893	0.0778697	0.00578323	0.232468	0.190807	0.294818	-0.293721	0.164906	0.121295	-0.104596	0.636766
[truncated: 19 more columns]
